# Supplementary material for: UHPLC–Q/Orbitrap/MS/MS Fingerprinting, Free Radical Scavenging, and Antimicrobial Activity of Tessaria absinthiodes (Hook. & Arn.) DC. (Asteraceae) Lyophilized Decoction from Argentina and Chile
Source: PubMed Central journal article supplement (PMC6943634; doi:10.3390/antiox8120593), 2019-11-28
Supplement: antioxidants-08-00593-s001.pdf [file antioxidants-08-00593-s001.pdf]

Supplementary Material for the article:

**UHPLC-Q/Orbitrap/MS/MS fingerprinting, free radical scavenging and antimicrobial activity of *Tessaria absinthiodes* (Hook. & Arn.) DC. (Asteraceae) lyophilized decoction from Argentina and Chile.**

Jessica Gómez <sup>1,2</sup>, Mario J. Simirgiotis <sup>3,4,\*</sup>, Beatriz Lima <sup>1,2</sup>, Carlos Gamarra-Luques <sup>2,5,6</sup>, Jorge Bórquez <sup>7</sup>, Duilio Caballero <sup>8</sup>, Gabriela Egly Feresin <sup>1,2</sup> and Alejandro Tapia <sup>1,\*</sup>

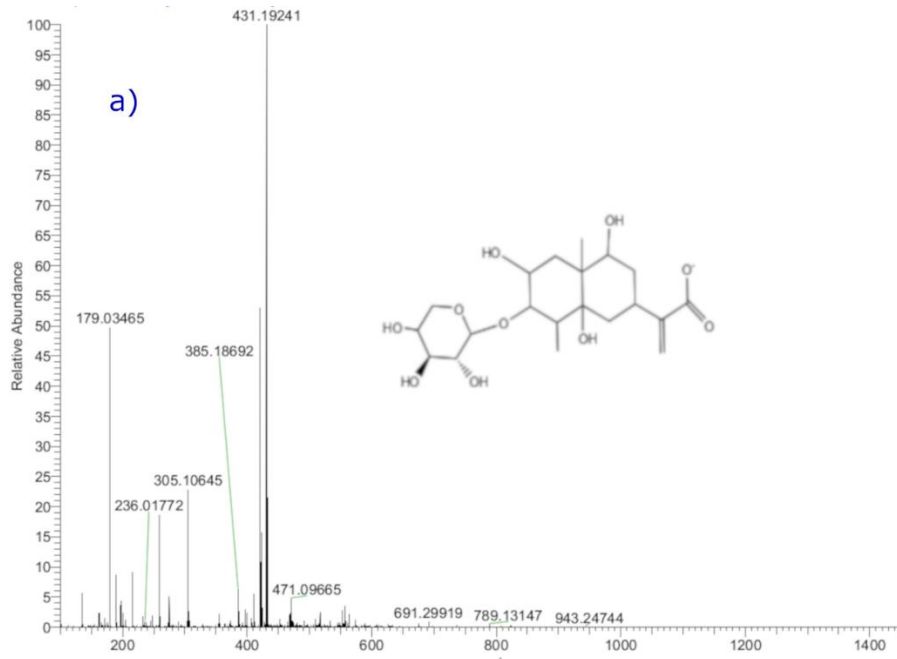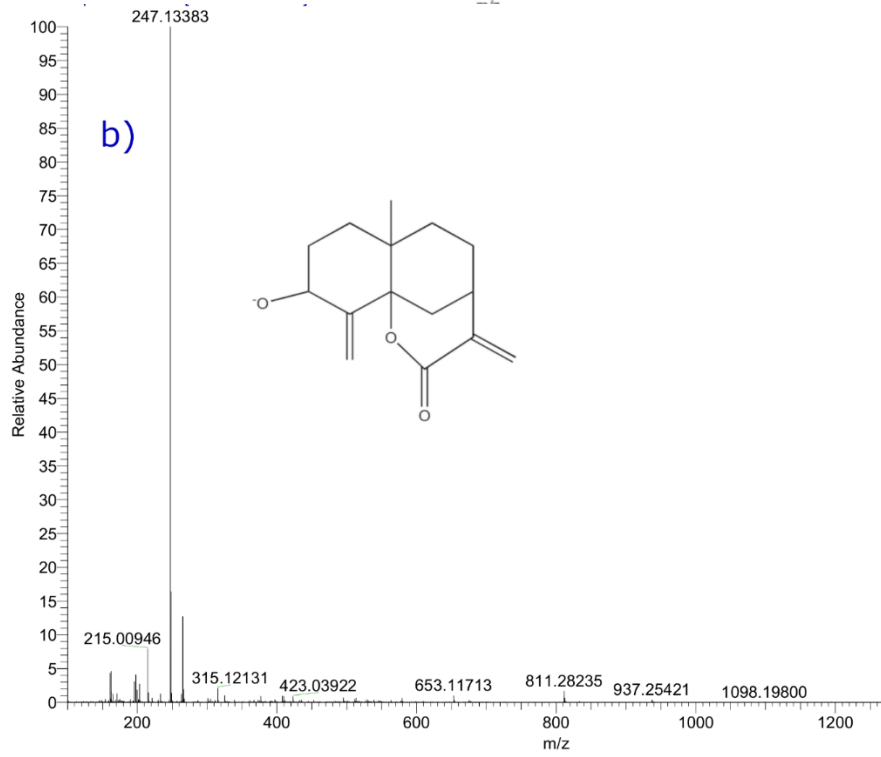

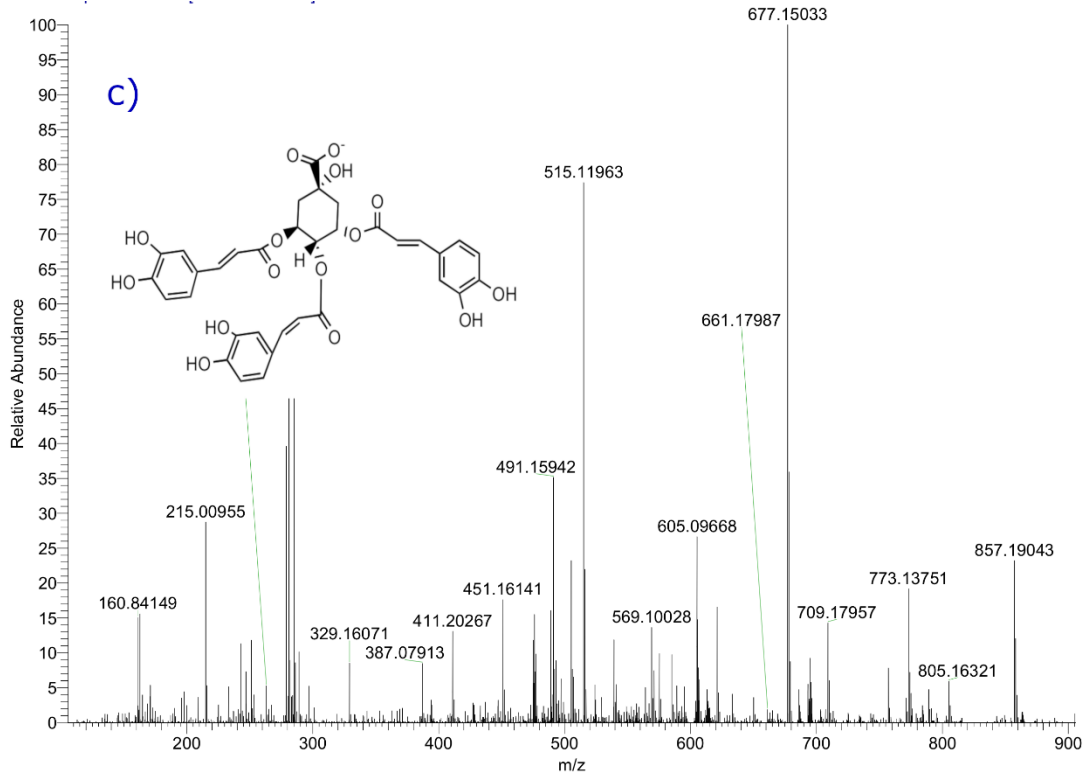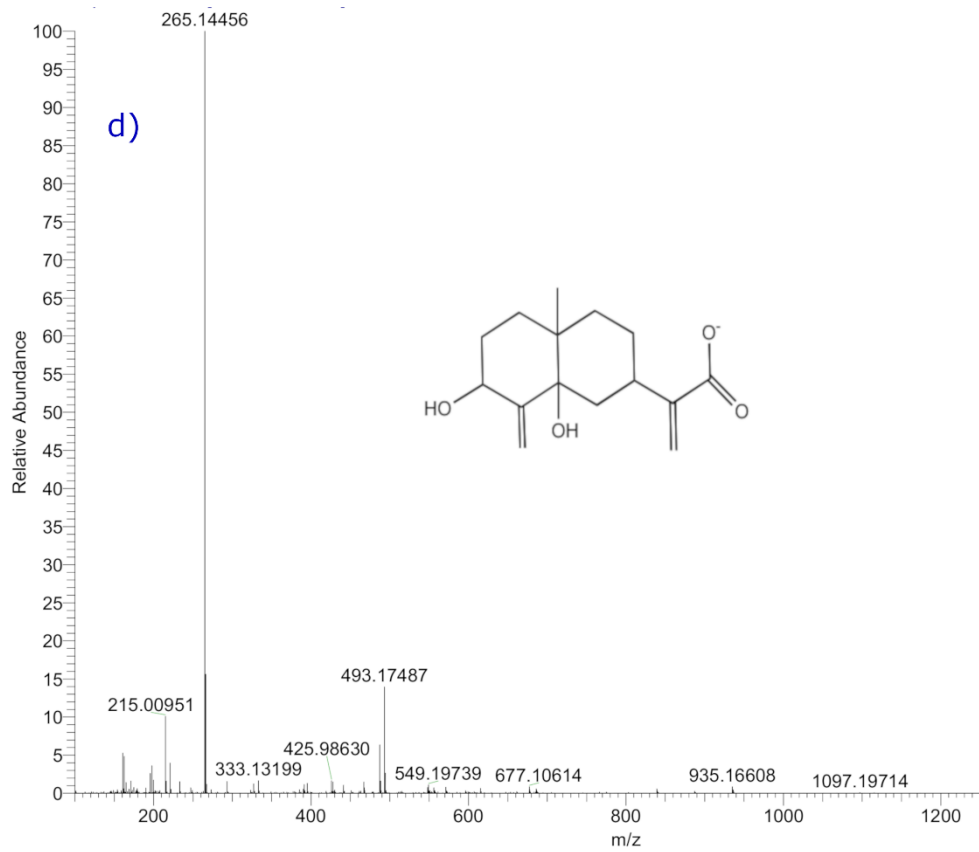

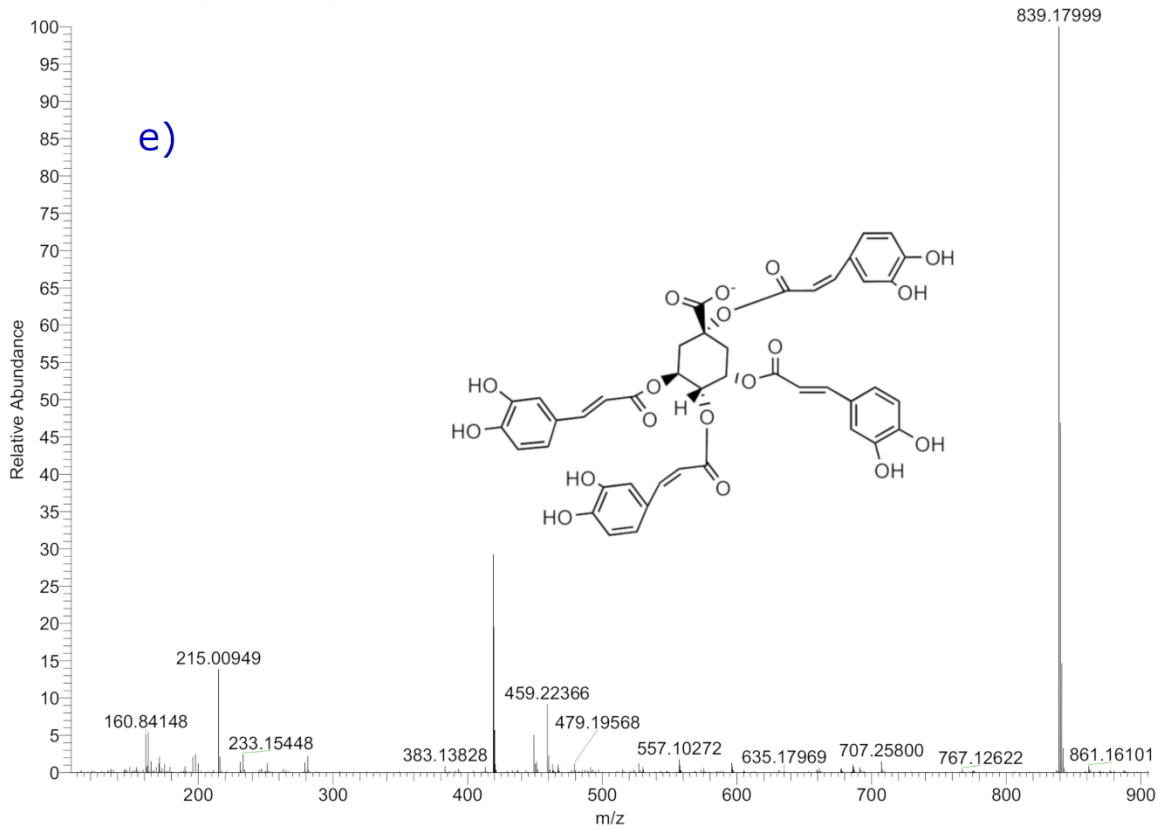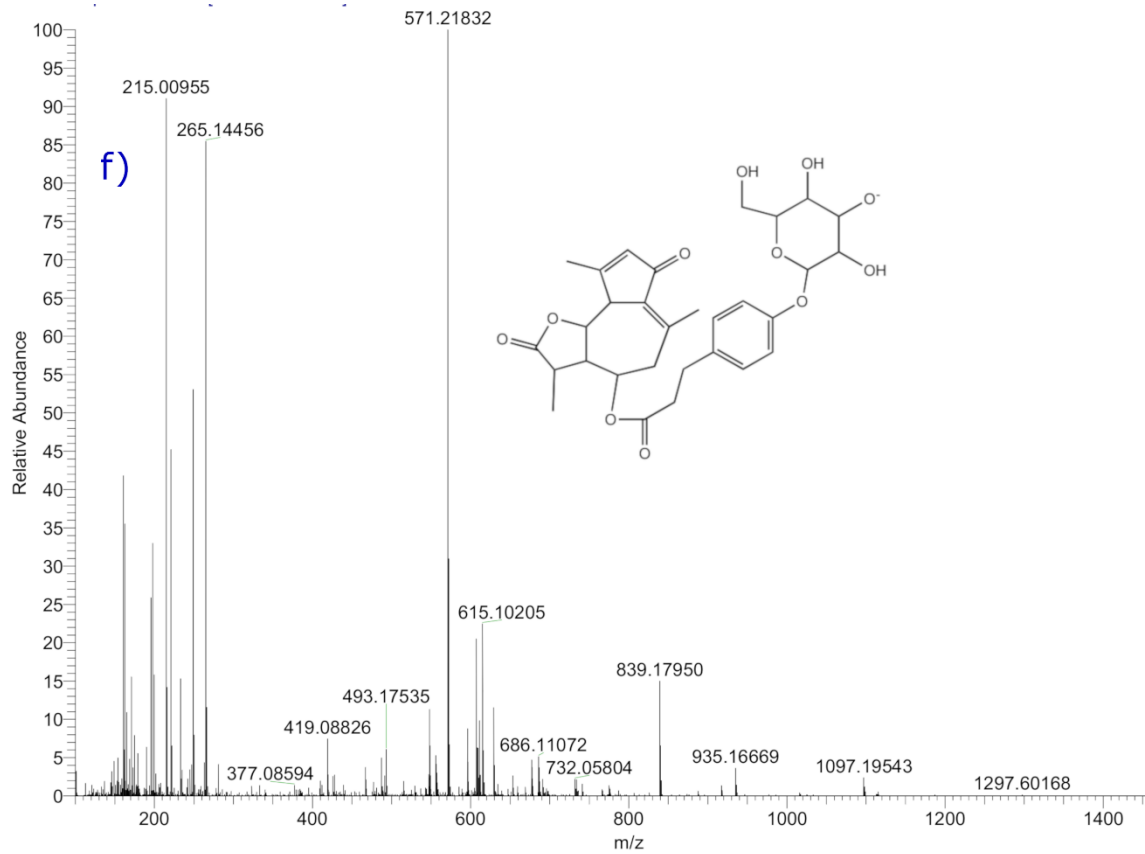

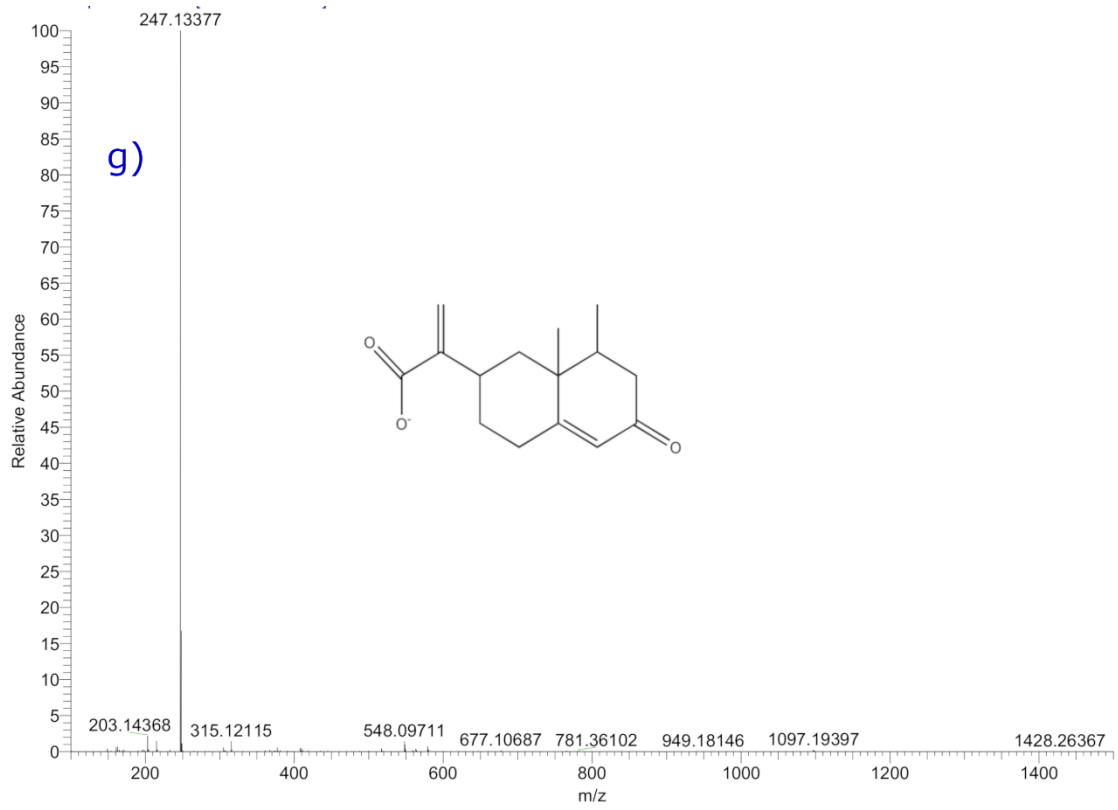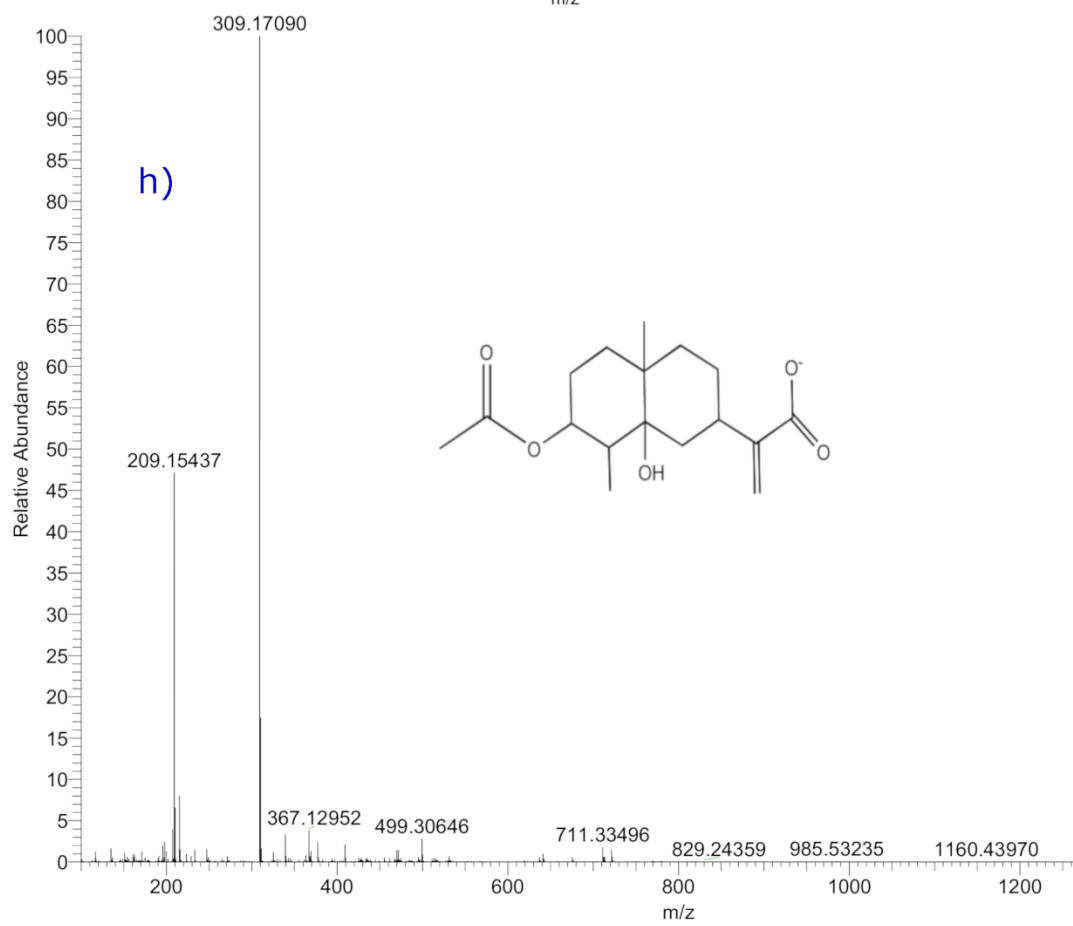

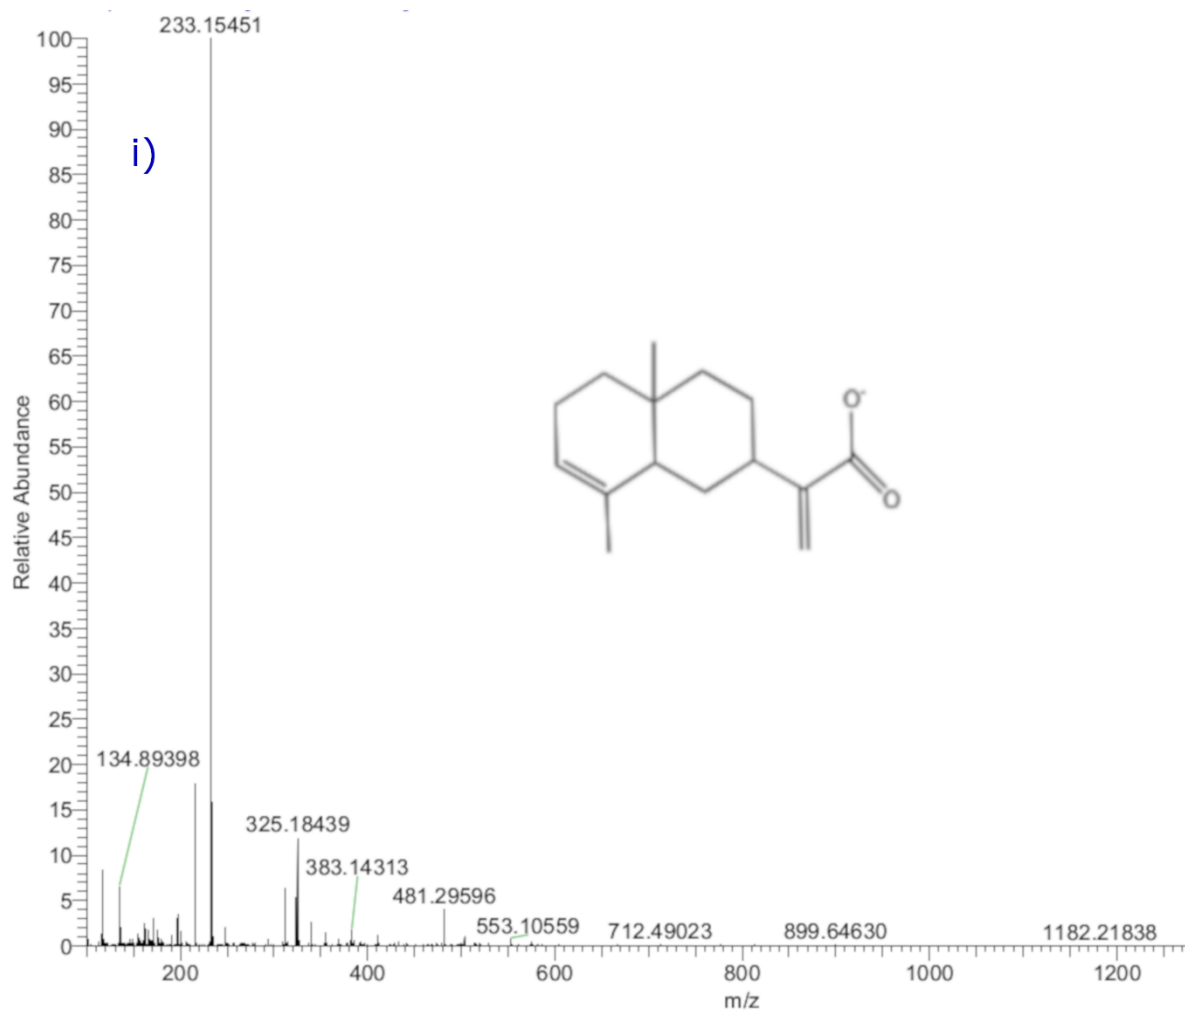

**Figure S1.** (a-i) Full orbitrap MS spectra of compounds 9(a), 18(b), 19(c), 23(d), 27(e), 28(f), 30(g), 33(h), and 38(i).
